# Supplementary material for: Retrospective cohort study of the performance of the Pinnacle metal on metal (MoM) total hip replacement: a single-centre investigation in combination with the findings of a national retrieval centre
Source: PubMed Central journal article supplement — BMJ Open. 2016 Apr 1;6(4):e007847. doi: 10.1136/bmjopen-2015-007847 (PMC4853972; doi:10.1136/bmjopen-2015-007847), 2016-04-01
Supplement: bmjopen-2015-007847supp_appendix1.pdf [file bmjopen-2015-007847supp_appendix1.pdf]

## Appendix 1 - Blood metal ion concentrations

A total of 308 patients with unilateral prostheses gave blood samples for metal ion testing.

|                                            |                    |
|--------------------------------------------|--------------------|
| Male:female hips                           | 129:179            |
| Median (range) shell size in mm            | 52 (50 - 66)       |
| Mean (range) age at primary                | 66 (40 -89)        |
| Mean (range) time to venesection in months | 52 (4 - 109)       |
| Median (range) Co in µg/l                  | 1.81(0.33 – 22.1)  |
| Median (range) Cr in µg/l                  | 4.82 (0.36 – 20.3) |

All non-parametric data was log normalised. A multiple regression model was constructed in order to examine the effect of cup inclination/anteversion, shell size, duration from primary operation to venesection and stem type on blood Co and Cr concentrations in patients with a unilateral prosthesis.

The results of this analysis are shown below

### For Co concentrations:

| Source           | t      | Pr >  t | Lower bound (95%) | Upper bound (95%) |
|------------------|--------|---------|-------------------|-------------------|
| Intercept        | 2.583  | 0.010   | 1.036             | 7.676             |
| Log[inclination] | 0.413  | 0.680   | -0.546            | 0.836             |
| Log[anteversion] | -1.758 | 0.080   | -0.273            | 0.015             |
| log [shell size] | -3.223 | 0.001   | -4.709            | -1.138            |
| Log[duration]    | 3.129  | 0.002   | 0.174             | 0.765             |
| Stem-CORAIL      | 2.798  | 0.006   | 0.046             | 0.267             |

Equation of the model:  $[\text{Log}]_{\text{cobalt}} = 4.356 + 0.145 \cdot \log[\text{inclination}] - 0.128 \cdot \log[\text{anteversion}] - 2.923 \cdot \log[\text{shell size}] + 0.4696 \cdot \log[\text{duration}] + 0.1565 \cdot \text{Stem-CORAIL}$

The resulting r squared value was 0.082 ( $p < 0.001$ ) meaning that the regression model described herein only accounted for approximately 8% of the variation in Co concentrations. Smaller shell sizes, longer duration from primary to venesection, and Corail stems were significantly associated with greater Co concentrations.

**For Cr concentrations:**

| Source           | t      | Pr >  t | Lower bound (95%) | Upper bound (95%) |
|------------------|--------|---------|-------------------|-------------------|
| Intercept        | 3.258  | 0.001   | 1.560             | 6.326             |
| Log[inclination] | 2.378  | 0.018   | 0.103             | 1.095             |
| Log[anteversion] | -3.505 | 0.001   | -0.288            | -0.081            |
| log [shell size] | -3.351 | 0.001   | -3.463            | -0.900            |
| Log[duration]    | -1.646 | 0.101   | -0.389            | 0.035             |
| Stem-CORAIL      | 0.412  | 0.681   | -0.062            | 0.096             |

Equation of the model:  $\text{Log}[\text{chromium}] = 3.943 + 0.5992 \cdot \text{log}[\text{inclination}] - 0.1842 \cdot [\text{log anteversion}] - 2.1815 \cdot \text{log}[\text{shell size}] - 0.1771 \cdot \text{log}[\text{duration}] + 1.6538\text{E-}02 \cdot \text{Stem-CORAIL}$

The resulting r squared value was 0.120 ( $p < 0.001$ ) meaning that the regression model described herein accounted for approximately 12% of the variation in Cr concentrations. Smaller shell sizes, higher inclination angles and lower anteversion angles were significantly associated with greater Cr concentrations.
