# Supplementary material for: Retrospective cohort study of the performance of the Pinnacle metal on metal (MoM) total hip replacement: a single-centre investigation in combination with the findings of a national retrieval centre
Source: PubMed Central journal article supplement — BMJ Open. 2016 Apr 1;6(4):e007847. doi: 10.1136/bmjopen-2015-007847 (PMC4853972; doi:10.1136/bmjopen-2015-007847), 2016-04-01
Supplement: bmjopen-2015-007847supp_appendix3.pdf [file bmjopen-2015-007847supp_appendix3.pdf]

### Appendix 3: Survival Analysis

A comparison of the revision rates of the unilateral versus bilateral Pinnacle prostheses. All patients in the study were included in this analysis with revision for all causes included.

|                | Cumulative percentage probability of revision (95% CI) at: |                  |                    |                    |                    |
|----------------|------------------------------------------------------------|------------------|--------------------|--------------------|--------------------|
|                | Year 1                                                     | Year 3           | Year 5             | Year 7             | Year 9             |
| Bilateral      | 1.0 (0.1 – 7.0)                                            | 7.1 (3.5 – 14.5) | 16.3 (10.4 – 25.6) | 24.5 (17.1 – 35.1) | 26.1 (18.5 – 37.5) |
| Number at risk | 100                                                        | 92               | 81                 | 56                 | 20                 |
| Unilateral     | 0.3 (0.1 – 2.1)                                            | 2.6 (1.2 – 4.5)  | 6.3 (4.3 – 9.4)    | 11.5 (8.6 - 15.4)  | 13.8 (10.4 – 18.4) |
| Number at risk | 389                                                        | 374              | 344                | 247                | 103                |

A comparison of the revision rates of the Pinnacle prostheses implanted into male and female patients. All patients in the study were included in this analysis with revision for all cause included.

|                | Cumulative percentage probability of revision (95% CI) at: |                 |                   |                    |                    |
|----------------|------------------------------------------------------------|-----------------|-------------------|--------------------|--------------------|
|                | Year 1                                                     | Year 3          | Year 5            | Year 7             | Year 9             |
| Female         | 0.7 (0.2 – 2.8)                                            | 4.7 (2.7 – 7.9) | 10.9 (7.8 – 15.3) | 18.2 (14.1 – 23.6) | 22.1 (17.1 – 28.6) |
| Number at risk | 282                                                        | 266             | 240               | 172                | 57                 |
| Male           | 0.5 (0.1 – 3.4)                                            | 2.0 (0.7 – 5.2) | 5.0 (2.7 – 9.1)   | 8.6 (5.3 - 13.7)   | 8.6 (10.4 – 18.4)  |
| Number at risk | 207                                                        | 199             | 185               | 130                | 103                |

Kaplan-Meier estimates of the cumulative percentage probability of revision (95% CI) of Pinnacle hips implanted into female patients. All cause revision. As there was a shorter follow up with the size 50mm liners, joints failed after six years of surgery and unrevised joints with less than six years of follow up were removed.

|                  | Cumulative percentage probability of revision (95% CI) at: |                   |                    |                    |                    |
|------------------|------------------------------------------------------------|-------------------|--------------------|--------------------|--------------------|
|                  | Year 1                                                     | Year 3            | Year 5             | Year 7             | Year 8             |
| Liner size 50    | 3.6 (0.5 – 24.5)                                           | 14.3 (5.8 – 35.4) | 25.0 (13.2 – 47.5) | 25.0 (13.2 – 47.5) | 25.0 (13.2 – 47.5) |
| Number at risk   | 28                                                         | 24                | 23                 | 20                 | 7                  |
| Liner size 52    | 0.6 (0.1 – 4.6)                                            | 5.2 (2.6 – 10.1)  | 13.5 (9.1 -20.2)   | 18.1 (12.9 – 25.3) | 18.1 (12.9 – 25.3) |
| Number at risk   | 155                                                        | 148               | 135                | 110                | 67                 |
| Liner size 54    | 0.0                                                        | 4.4 (1.1 – 17.2)  | 8.9 (3.5 -22.7)    | 8.9 (3.5 -22.7)    | 8.9 (3.5 -22.7)    |
| Number at risk   | 45                                                         | 44                | 43                 | 36                 | 24                 |
| Liner size 56/58 | 0                                                          | 0                 | 0                  | 0                  | 0                  |
| Number at risk   | 17                                                         | 17                | 17                 | 16                 | 9                  |

Kaplan-Meier estimates of the cumulative percentage probability of revision (95% CI) of Pinnacles implanted into female and male patients belonging to the early and late cohorts. Survival curves top, with corresponding cumulative percentage probabilities bottom.

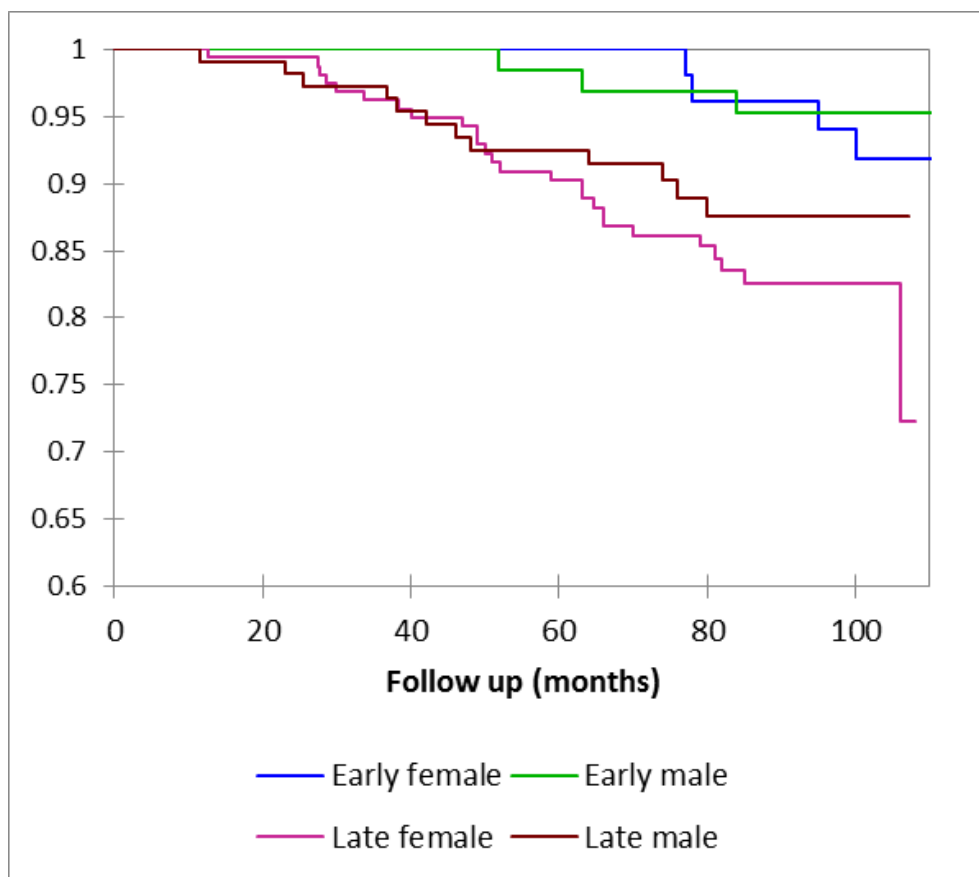

|                     | Cumulative percentage probability of revision (95% CI) at: |                 |                  |                    |                    |
|---------------------|------------------------------------------------------------|-----------------|------------------|--------------------|--------------------|
|                     | <b>Year 1</b>                                              | <b>Year 3</b>   | <b>Year 5</b>    | <b>Year 7</b>      | <b>Year 8</b>      |
| Early female cohort | 0.0                                                        | 0.0             | 0.0              | 3.9 (1 – 15.3)     | 8.1 (3.2 – 20.7)   |
| Number at risk      | 53                                                         | 53              | 53               | 49                 | 46                 |
| Early male cohort   | 0.0                                                        | 0.0             | 1.6 (0.2 – 11.1) | 4.8 (1.6 – 14.4)   | 4.8 (1.6 – 14.4)   |
| Number at risk      | 67                                                         | 65              | 63               | 61                 | 60                 |
| Late female cohort  | 0.0                                                        | 4.4 (2.2 – 9.2) | 9.8 (6.0 – 15.8) | 16.5 (11.4 – 23.8) | 17.4 (12.1 – 25.0) |
| Number at risk      | 160                                                        | 152             | 152              | 90                 | 35                 |
| Late male cohort    | 1.3 (0.1 – 6.5)                                            | 3.7 (1.4 – 9.6) | 7.5 (3.8 – 14.6) | 9.7 (5.4 – 17.6)   | 12.5 (7.3 – 21.4)  |

|                |     |     |    |    |    |
|----------------|-----|-----|----|----|----|
| Number at risk | 109 | 105 | 95 | 75 | 17 |
|----------------|-----|-----|----|----|----|
